# Supplementary material for: Acid-catalysed direct transformation of cellulose into methyl glucosides in methanol at moderate temperatures
Source: Royal Society of Chemistry journal article supplement (doi:10.1039/b925723c), 2010-01-01
Supplement: b925723c.pdf [file b925723c.pdf]

# Acid-catalysed direct transformation of cellulose into methyl glucosides in methanol at moderate temperatures

Weiping Deng, Mi Liu, Qinghong Zhang\*, Xuesong Tan and Ye Wang\*

*State Key Laboratory of Physical Chemistry of Solid Surfaces, National Engineering Laboratory for Green Chemical Productions of Alcohols, Ethers and Esters, College of Chemistry and Chemical Engineering, Xiamen University, Xiamen 361005, China*

## Electronic Supplementary Information

### 1. Experimental Details

#### (1) Catalytic materials and catalyst preparation methods

(1) HCl, HNO<sub>3</sub>, H<sub>2</sub>SO<sub>4</sub>, H<sub>3</sub>PO<sub>4</sub> and CF<sub>3</sub>COOH: These chemicals were purchased from Sinopharm Chemical Reagent Co., Ltd, Shanghai, China.

(2) H-ZSM-5: This acidic zeolite was purchased from Nankai University.

(3) Nafion and Amberlyst-15: These two polymeric resin-based materials were purchased from Alfa Aesar.

(4) Sulfated ZrO<sub>2</sub>:<sup>1</sup> ZrO<sub>2</sub> (5 g, Alfa Aesar) was sulfated using 200 mL aqueous solution of H<sub>2</sub>SO<sub>4</sub> (0.5 mol L<sup>-1</sup>). The slurry containing powdery ZrO<sub>2</sub> and an appropriate quantity of H<sub>2</sub>SO<sub>4</sub> was stirred for 2 h. Then, the solid was collected and dried at 393 K overnight, followed by calcination in air at 923 K.

(5) Carbon (cell.)-SO<sub>3</sub>H-98% and carbon (lig.)-SO<sub>3</sub>H-98%:<sup>2</sup> The starting materials (cellulose and lignin purchased from Alfa Aesar and Tokyo Chemical Industry Co., Ltd., respectively) were heated at 723 K in N<sub>2</sub> flow for 5 h to produce black solids, which were then ground to powders. Subsequently, the carbon powders were boiled in 100 mL of concentrated sulfuric acid (98%) at 353 K for 15 h under N<sub>2</sub>. After cooling to room temperature, the suspension was filtered to yield a black precipitate, which was washed repeatedly until sulfate ions could not be detected in the filtrate.

(6) Lig.-SO<sub>3</sub>H-64% and lig.-SO<sub>3</sub>H-17%: Typically, lignin (5 g) was heated in sulfuric acid (64% or 17%, 100 mL) at 483 K for 20 h under a flow of N<sub>2</sub>. The resulting carbon materials were washed repeatedly with water at room temperature until sulfate ions could not be detected in the filtrate.

(7) H<sub>3</sub>PW<sub>12</sub>O<sub>40</sub> and H<sub>4</sub>SiW<sub>12</sub>O<sub>40</sub>:<sup>3</sup> Na<sub>2</sub>WO<sub>4</sub> (200 g) and Na<sub>2</sub>HPO<sub>4</sub> (8 g) were dissolved in 200 mL water to make a clear solution. H<sub>2</sub>SO<sub>4</sub> (90%) was then added into the solution and then stirred for 1 h at room temperature. Finally, H<sub>3</sub>PW<sub>12</sub>O<sub>40</sub> was extracted by diethyl ether (100 mL) from water. H<sub>4</sub>SiW<sub>12</sub>O<sub>40</sub> was prepared using a similar procedure except for using Na<sub>2</sub>SiO<sub>3</sub> instead of Na<sub>2</sub>HPO<sub>4</sub> as a starting material.

#### (2) Catalytic reactions

Microcrystalline cellulose purchased from Alfa Aesar with a crystallinity of 85% was used in this work. The conversion of cellulose was performed in a Teflon-lined stainless-steel autoclave. After the catalyst and cellulose (typically 0.5 g, equivalent to 3 mmol C<sub>6</sub>H<sub>10</sub>O<sub>5</sub> unit) were added into the autoclave pre-charged with methanol (typically 20 mL), N<sub>2</sub> of 3 MPa was introduced. The reaction was started by heating the mixture to a reaction temperature. After the reaction, the products were analyzed by HPLC (Shimazu LC-20A) equipped with a RI detector and a Shodex<sup>TM</sup> SH1011 column (10  $\mu$ m, 6.5  $\times$  300 mm). The conversion of cellulose was also estimated by the change of the weight of cellulose after the reaction.

## 2. Properties of Liquid Acids

Table S1 shows some properties of the liquid acids used in Table 1 in the main text. Table 1 in the main text demonstrates that only dilute H<sub>2</sub>SO<sub>4</sub> can provide a significant yield of methyl glucosides. H<sub>2</sub>SO<sub>4</sub> is a relatively stronger acid with a p*K*<sub>a</sub> of -3.00, while the p*K*<sub>a</sub> values for HCl, HNO<sub>3</sub>, H<sub>3</sub>PO<sub>4</sub> and CF<sub>3</sub>COOH are -4.00, -1.00, 2.15 and 0.52, respectively. Moreover, the boiling point of H<sub>2</sub>SO<sub>4</sub> (610 K) is significantly higher than those of the other acids. Because we have used a reaction temperature of 473 K in our reaction, we speculate that the higher boiling point of H<sub>2</sub>SO<sub>4</sub> may be beneficial for the catalytic conversion of cellulose at such a temperature.

**Table S1** Some properties of liquid acids<sup>a</sup>

| Acid                           | Boiling point /K | p <i>K</i> <sub>a</sub> |
|--------------------------------|------------------|-------------------------|
| HCl                            | 334              | -4.00                   |
| CF <sub>3</sub> COOH           | 346              | 0.52                    |
| H <sub>3</sub> PO <sub>4</sub> | 431              | 2.15                    |
| HNO <sub>3</sub>               | 356              | -1.00                   |
| H <sub>2</sub> SO <sub>4</sub> | 610              | -3.00                   |

<sup>a</sup> CRC Handbook of Chemistry and Physics, 87<sup>th</sup> edition, 2006-2007.

## 3. Formation of Methyl Levulinate

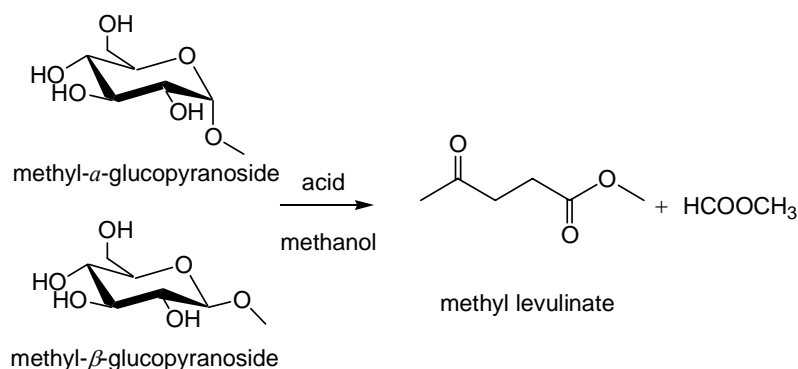

**Scheme S1.** Formation of methyl levulinate from methyl glucosides.

#### 4. Effect of Reaction Time on Catalytic Performances of Three Typical Catalysts for the Conversion of Cellulose in Methanol

Table S2 shows the effect of reaction time on catalytic performances of three typical acid catalysts, i.e., H<sub>2</sub>SO<sub>4</sub>, H<sub>3</sub>PW<sub>12</sub>O<sub>40</sub> and lig.-SO<sub>3</sub>H-17% for the conversion of cellulose in methanol.

**Table S2** Effect of reaction time on catalytic performances of three typical catalysts for the conversion of cellulose in methanol<sup>a</sup>

| Catalyst                                        | H <sup>+</sup> conc.<br>/mmol L <sup>-1</sup> | Time<br>/min | Conv.<br>/% | Yield <sup>b</sup> /% |               |      | TON <sup>c</sup> |
|-------------------------------------------------|-----------------------------------------------|--------------|-------------|-----------------------|---------------|------|------------------|
|                                                 |                                               |              |             | M- $\alpha$ -G        | M- $\beta$ -G | ML   |                  |
| H <sub>2</sub> SO <sub>4</sub> <sup>d</sup>     | 6.7                                           | 20           | 66          | 20                    | 14            | 3.0  | 5.2              |
|                                                 |                                               | 30           | 76          | 28                    | 20            | 2.8  | 7.4              |
|                                                 |                                               | 40           | 85          | 25                    | 18            | 9.3  | 6.6              |
|                                                 |                                               | 60           | 90          | 20                    | 14            | 16   | 5.2              |
| H <sub>3</sub> PW <sub>12</sub> O <sub>40</sub> | 2.6                                           | 6            | 50          | 20                    | 14            | 0.3  | 20               |
|                                                 |                                               | 20           | 71          | 28                    | 20            | 1.0  | 29               |
|                                                 |                                               | 30           | 86          | 31                    | 22            | 3.0  | 31               |
|                                                 |                                               | 40           | 88          | 27                    | 20            | 4.0  | 28               |
|                                                 |                                               | 60           | 95          | 25                    | 18            | 5.3  | 26               |
| Lig.-SO <sub>3</sub> H-17%                      | 5.0                                           | 20           | 16          | 14                    | 10            | 0    | 7.4              |
|                                                 |                                               | 30           | 59          | 22                    | 16            | 0    | 12               |
|                                                 |                                               | 45           | 65          | 24                    | 18            | 0    | 13               |
|                                                 |                                               | 60           | 72          | 28                    | 20            | 0.50 | 15               |
|                                                 |                                               | 90           | 78          | 29                    | 21            | 1.0  | 15               |
|                                                 |                                               | 120          | 82          | 35                    | 26            | 3.0  | 19               |
|                                                 |                                               | 150          | 90          | 30                    | 22            | 4.0  | 16               |

<sup>a</sup>Reaction conditions: cellulose, 0.50 g; methanol, 20 mL; temperature, 468 K. <sup>b</sup>M- $\alpha$ -G, M- $\beta$ -G and ML denote methyl- $\alpha$ -glucopyranoside, methyl- $\beta$ -glucopyranoside and methyl levulinate, respectively. <sup>c</sup>TON was calculated by the moles of methyl glucosides formed per mole of H<sup>+</sup>.

<sup>d</sup>Temperature, 473 K; methanol, 30 mL.

#### 5. Activity and Structure of the Recovered H<sub>3</sub>PW<sub>12</sub>O<sub>40</sub> Catalyst after Reaction

The recovered H<sub>3</sub>PW<sub>12</sub>O<sub>40</sub> catalyst was re-used in the conversion of cellulose in methanol under the following conditions: cellulose, 0.50 g; N<sub>2</sub>, 3 MPa; methanol, 20 mL; temperature, 468 K; time, 0.5 h. We obtained products of methyl- $\alpha$ -glucopyranoside, methyl- $\beta$ -glucopyranoside and methyl levulinate with yields of 31%, 20% and 2.0%, respectively. These yields were quite close to those obtained in the first-time reaction (yields of methyl- $\alpha$ -glucopyranoside, methyl- $\beta$ -glucopyranoside and methyl levulinate were 31%, 22% and 3.0%, respectively). Therefore, we conclude that there are no significant changes in activity for the recovered catalyst.

The recovered H<sub>3</sub>PW<sub>12</sub>O<sub>40</sub> catalyst has also been characterized by X-ray diffraction measurements. Fig. S1 shows that the XRD pattern for the recovered catalyst is almost the same with that for the fresh catalyst. Thus, it can be concluded that the structure of the H<sub>3</sub>PW<sub>12</sub>O<sub>40</sub> catalyst did not undergo significant changes after the reaction.

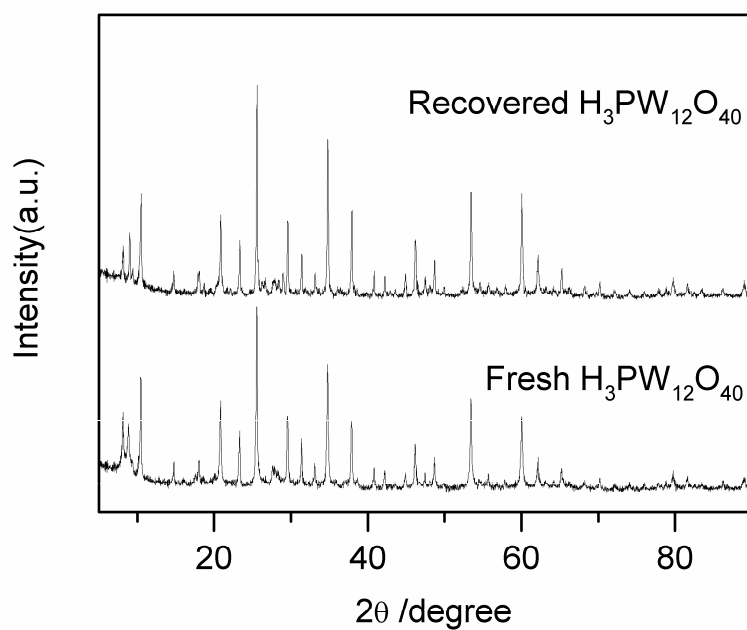

**Fig. S1** XRD patterns of the fresh and the recovered H<sub>3</sub>PW<sub>12</sub>O<sub>40</sub> catalysts.

#### References

- 1 R. Srinivasan, T. Watkins, C. Hubbard and B. H. Davis, *Chem. Mater.*, 1995, **7**, 725.
- 2 S. Suganuma, K. Nakajima, M. Kitano, D. Yamaguchi, H. Kato, S. Hayashi and M. Hara, *J. Am. Chem. Soc.*, 2008, **130**, 12787.
- 3 M. T. Pope, *Heteropoly and Isopoly Oxometalates*, Springer Verlag, Berlin, 1983.
